# Supplementary material
Source: publisher figshare collection journal article supplement (https://gsajournals.figshare.com/ndownloader/files/13519556)
Supplement: Supplementary file 1 [file 13519556]

## Sheet: HopZ1a
Table S4. Congruence scores for yeast genes with genetic interaction profiles similar to that of HopZ1a.
Effector	Congruent Genes	Congruent Score
HopZ1a	ABP1	4.981
HopZ1a	IPK1	4.952
HopZ1a	YSP1	4.833
HopZ1a	YKL061W	4.713
HopZ1a	SHE4	4.647
HopZ1a	HOC1	3.811
HopZ1a	TRE1	3.744
HopZ1a	SEC66	3.728
HopZ1a	VPS36	3.637
HopZ1a	GPR1	3.57
HopZ1a	RPP2B	3.57
HopZ1a	CIN8	3.525
HopZ1a	VAC14	3.432
HopZ1a	KAR3	3.344
HopZ1a	SHP1	3.183
HopZ1a	SOL3	3.102
HopZ1a	LAS21	3.071
HopZ1a	DIA2	3.001
HopZ1a	MNN11	2.98
HopZ1a	RUD3	2.968
HopZ1a	DEG1	2.892
HopZ1a	act1-125	2.79
HopZ1a	kre5-ts2	2.781
HopZ1a	FMO1	2.767
HopZ1a	PTP1	2.764
HopZ1a	mps1-417	2.731
HopZ1a	RPC19_damp	2.731
HopZ1a	SVF1	2.722
HopZ1a	YND1	2.684
HopZ1a	SPI1	2.679
HopZ1a	PMC1	2.679
HopZ1a	PKH3	2.638
HopZ1a	YPI1_damp	2.6
HopZ1a	ARP6	2.579
HopZ1a	GCN2	2.565
HopZ1a	rsp5-3	2.551
HopZ1a	act1-129	2.528
HopZ1a	CYK3	2.47
HopZ1a	RTT101	2.461
HopZ1a	YOR114W	2.461
HopZ1a	tor2-29	2.457
HopZ1a	YNL086W	2.444
HopZ1a	ERP5	2.429
HopZ1a	CAB1_damp	2.394
HopZ1a	stu1-5	2.382
HopZ1a	VPS4	2.323
HopZ1a	cdc1-2	2.315
HopZ1a	SLY41	2.315
HopZ1a	act1-120	2.301
HopZ1a	CYC8	2.288
HopZ1a	KIP2	2.288
HopZ1a	DED1_damp	2.263
HopZ1a	FET4	2.238
HopZ1a	RPL14B	2.238
HopZ1a	CLA4	2.235
HopZ1a	RIM13	2.225
HopZ1a	DYN1	2.204
HopZ1a	BIK1	2.191
HopZ1a	EXG2	2.191
HopZ1a	PSH1	2.191
HopZ1a	MMS1	2.191
HopZ1a	BRE5	2.186
HopZ1a	CHA1	2.168
HopZ1a	RBL2	2.168
HopZ1a	DFM1	2.146
HopZ1a	SWI4	2.144
HopZ1a	SLA1	2.134
HopZ1a	scc2-4	2.125
HopZ1a	ERD1	2.125
HopZ1a	SCD5_damp	2.125
HopZ1a	ELM1	2.115
HopZ1a	VPS9	2.106
HopZ1a	NIP100	2.106
HopZ1a	cdc43-2	2.104
HopZ1a	PEX5	2.063
HopZ1a	DFG16	2.059
HopZ1a	pol5-2	2.025
HopZ1a	taf5-15	2.015
HopZ1a	RPI1	2.007
HopZ1a	RMA1	2.007
HopZ1a	MMS22	2.007
